# Supplementary material
Source: PubMed Central journal article supplement (PMC4418341)
Supplement: jaramillo_data_supplement.pdf [file jaramillo_data_supplement.pdf]

## Online Data Supplement

### Reduced Bone Density and Vertebral Fractures in Smokers: Men and COPD Patients at Increased Risk

Joshua D. Jaramillo BA<sup>1,2</sup>, Carla Wilson MS<sup>1</sup>, Douglas J. Stinson BS<sup>1</sup>, David A. Lynch MD<sup>1</sup>, Russell P. Bowler MD<sup>1</sup>, Sharon Lutz PhD<sup>3</sup>, Jessica M. Bon MD<sup>4</sup>, Ben Arnold PhD<sup>5</sup>, Merry-Lynn N. McDonald PhD<sup>6</sup>, George R. Washko MD<sup>6</sup>, Emily S. Wan MD<sup>6</sup>, Dawn L. DeMeo MD<sup>6</sup>, Marilyn G. Foreman MD<sup>7</sup>, Xavier Soler MD<sup>8</sup>, Sarah E. Lindsay<sup>1</sup>, Nancy E. Lane MD<sup>9</sup>, Harry K. Genant MD<sup>10</sup>, Edwin K. Silverman MD<sup>6</sup>, John E. Hokanson PhD<sup>3</sup>, Barry J. Make MD<sup>1</sup>, James D. Crapo MD<sup>1</sup>, Elizabeth A. Regan MD<sup>1</sup>, and the COPDGene Investigators.

Index:

NIH Grant Support and Disclaimer ..... 2  
COPD Foundation Funding..... 2  
COPDGene<sup>®</sup> Investigators – Core Units..... 2  
COPDGene<sup>®</sup> Investigators – Clinical Centers..... 3

Figures            5 .....  
    Appendix Figure 1 Axial CT image..... 5  
    Appendix Figure 2 Mean BMD in COPD subjects compared to smokers without COPD ..... 6

Tables             ..... 7  
    Appendix Table 1 Modified GOLD Classification..... 7  
    Appendix Table 2 QCT BMD Cohort Compared to Remaining COPDGene Subjects..... 8  
    Appendix Table 3 Race and Gender ..... 9

## NIH Grant Support and Disclaimer

The project described was supported by Award Number R01HL089897 and Award Number R01HL089856 from the National Heart, Lung, And Blood Institute. The content is solely the responsibility of the authors and does not necessarily represent the official views of the National Heart, Lung, And Blood Institute or the National Institutes of Health.

## COPD Foundation Funding

The COPDGene<sup>®</sup> project is also supported by the COPD Foundation through contributions made to an Industry Advisory Board comprised of AstraZeneca, Boehringer Ingelheim, Novartis, Pfizer, Siemens, Sunovion, and GlaxoSmithKline

## COPDGene<sup>®</sup> Investigators – Core Units

*Administrative Core:* James Crapo, MD (PI), Edwin Silverman, MD, PhD (PI), Barry Make, MD, Elizabeth Regan, MD, PhD

*Genetic Analysis Core:* Terri Beaty, PhD, Nan Laird, PhD, Christoph Lange, PhD, Michael Cho, MD, Stephanie Santorico, PhD, John Hokanson, MPH, PhD, Dawn DeMeo, MD, MPH, Nadia Hansel, MD, MPH, Craig Hersh, MD, MPH, Peter Castaldi, MD, MSc, Merry-Lynn McDonald, PhD, Emily Wan, MD, Megan Hardin, MD, Jacqueline Hetmanski, MS, Margaret Parker, MS, Marilyn Foreman, MD, Brian Hobbs, MD, Robert Busch, MD, Adel El-Bouiez, MD, Peter Castaldi, MD, Megan Hardin, MD, Dandi Qiao, PhD, Elizabeth Regan, MD, Eitan Halper-Stromberg, Ferdouse Begum, Sungho Won, Brittney Fredericksen, Sharon Lutz, PhD

*Imaging Core:* David A Lynch, MB, Harvey O Coxson, PhD, MeiLan K Han, MD, MS, MD, Eric A Hoffman, PhD, Stephen Humphries MS, Francine L Jacobson, MD, Philip F Judy, PhD, Ella A Kazerooni, MD, John D Newell, Jr., MD, Elizabeth Regan, MD, James C Ross, PhD, Raul San Jose Estepar, PhD, Berend C Stoel, PhD, Juerg Tschirren, PhD, Eva van Rikxoort, PhD, Bram van Ginneken, PhD, George Washko, MD, Carla G Wilson, MS, Mustafa Al Qaisi, MD, Teresa Gray, Alex Klueber, Tanya Mann, Jered Sieren, Douglas Stinson, Joyce Schroeder, MD, Edwin Van Beek, MD, PhD

*PFT QA Core, Salt Lake City, UT:* Robert Jensen, PhD

*Data Coordinating Center and Biostatistics, National Jewish Health, Denver, CO:* Douglas Everett, PhD, Anna Faino, MS, Matt Strand, PhD, Carla Wilson, MS

*Epidemiology Core, University of Colorado Anschutz Medical Campus, Aurora, CO:* John E. Hokanson, MPH, PhD, Jennifer Black-Shinn, MPH, PhD, Gregory Kinney, MPH, PhD, Sharon Lutz, PhD, Katherine Pratte, MSPH

## **COPDGene<sup>®</sup> Investigators – Clinical Centers**

*Ann Arbor VA:* Jeffrey Curtis, MD, Carlos Martinez, MD, MPH, Perry G. Pernicano, MD

*Baylor College of Medicine, Houston, TX:* Nicola Hanania, MD, MS, Philip Alapat, MD, Venkata Bandi, MD, Mustafa Atik, MD, Aladin Boriek, PhD, Kalpatha Guntupalli, MD, Elizabeth Guy, MD, Amit Parulekar, MD, Arun Nachiappan, MD

*Brigham and Women's Hospital, Boston, MA:* Dawn DeMeo, MD, MPH, Craig Hersh, MD, MPH, George Washko, MD, Francine Jacobson, MD, MPH

*Columbia University, New York, NY:* R. Graham Barr, MD, DrPH, Byron Thomashow, MD, John Austin, MD, Belinda D'Souza, MD, Gregory D.N. Pearson, MD, Anna Rozenshtein, MD, MPH, FACR

*Duke University Medical Center, Durham, NC:* Neil MacIntyre, Jr., MD, Lacey Washington, MD, H. Page McAdams, MD

*Health Partners Research Foundation, Minneapolis, MN:* Charlene McEvoy, MD, MPH, Joseph Tashjian, MD

*Johns Hopkins University, Baltimore, MD:* Robert Wise, MD, Nadia Hansel, MD, MPH, Robert Brown, MD, Karen Horton, MD, Nirupama Putcha, MD, MHS,

*Los Angeles Biomedical Research Institute at Harbor UCLA Medical Center, Los Angeles, CA:* Richard Casaburi, MD, Alessandra Adami, PhD, Janos Porszasz, MD, PhD, Hans Fischer, MD, PhD, Matthew Budoff, MD, Dan Cannon, PhD, Harry Rossiter, PhD

*Michael E. DeBakey VAMC, Houston, TX:* Amir Sharafkhaneh, MD, PhD, Charlie Lan, DO

*Minneapolis VA:* Christine Wendt, MD, Brian Bell, MD

*Morehouse School of Medicine, Atlanta, GA:* Marilyn Foreman, MD, MS, Gloria Westney, MD, MS, Eugene Berkowitz, MD, PhD

*National Jewish Health, Denver, CO:* Russell Bowler, MD, PhD, David Lynch, MD

*Reliant Medical Group, Worcester, MA:* Richard Rosiello, MD, David Pace, MD

*Temple University, Philadelphia, PA:* Gerard Criner, MD, David Ciccolella, MD, Francis Cordova, MD, Chandra Dass, MD, Robert D'Alonzo, DO, Parag Desai, MD, Michael Jacobs, PharmD, Steven Kelsen, MD, PhD, Victor Kim, MD, A. James Mamary, MD, Nathaniel Marchetti, DO, Aditti Satti, MD, Kartik Shenoy, MD, Robert M. Steiner, MD, Alex Swift, MD, Irene Swift, MD, Gloria Vega-Sanchez, MD

*University of Alabama, Birmingham, AL:* Mark Dransfield, MD, William Bailey, MD, J. Michael Wells, MD, Surya Bhatt, MD, Hrudaya Nath, MD

*University of California, San Diego, CA:* Joe Ramsdell, MD, Paul Friedman, MD, Xavier Soler, MD, PhD, Andrew Yen, MD

*University of Iowa, Iowa City, IA:* Alejandro Cornellias, MD, John Newell, Jr., MD, Brad Thompson, MD

*University of Michigan, Ann Arbor, MI:* MeiLan Han, MD, Ella Kazerooni, MD, Fernando Martinez, MD,

*University of Minnesota, Minneapolis, MN:* Joanne Billings, MD, Tadashi Allen, MD

*University of Pittsburgh, Pittsburgh, PA:* Frank Scirba, MD, Divay Chandra, MD, MSc, Joel Weissfeld, MD, MPH, Carl Fuhrman, MD, Jessica Bon, MD

*University of Texas Health Science Center at San Antonio, San Antonio, TX:* Antonio Anzueto, MD, Sandra Adams, MD, Diego Maselli-Caceres, MD, Mario E. Ruiz, MD

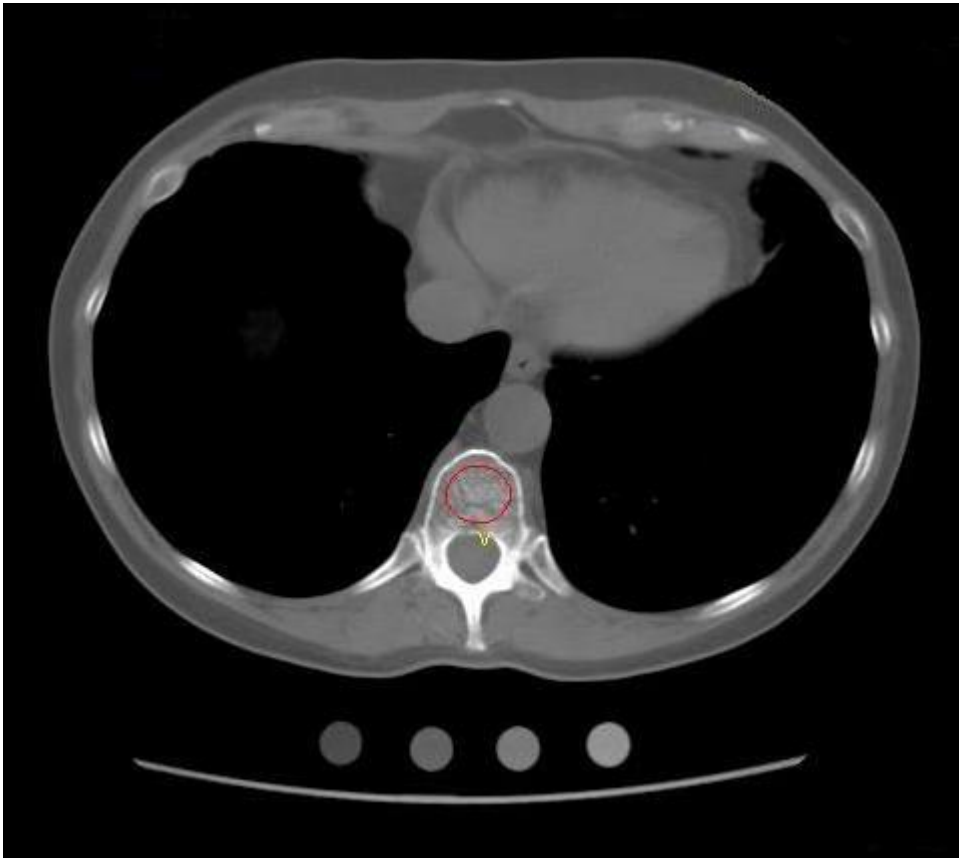

**Figure E1:** Axial CT image

Using the calcium calibration rods (circular densities at base of scan image) that is imbedded in the CT scanner pad under the subject and its density data stored within the chest CT image, with dedicated software (Image Analysis, Lexington, KY), volumetric bone density (mg/cc) is determined for each selected vertebra where a region of interest has been defined. This method reduces the effect of falsely increased BMD values from measuring the additional density of adjacent tissues including bony osteophytes associated with degenerative spine disease and differences in fat and lean mass.

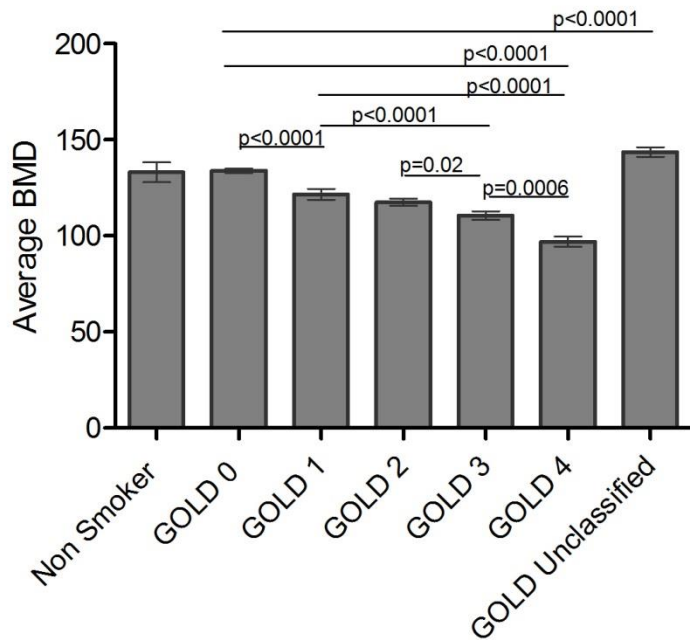

**Figure E2:** Mean BMD is significantly decreased in COPD subjects compared to smokers without COPD

Smokers were classified using post-bronchodilator spirometry based on a modified GOLD classification for COPD (eTable 1). Average vBMD was calculated for each group. GOLD unclassified smokers had FEV<sub>1</sub> or FVC less than 80% of their predicted values based on age and gender but a normal FEV<sub>1</sub>/FVC ratio and therefore are smokers without COPD. GOLD groups 1 – 4 show step-wise decreases in vBMD that are significant at each level except between GOLD 1 and GOLD 2 groups. Both GOLD unclassified and GOLD 0 smokers have significantly higher vBMD than the COPD subjects. GOLD U subjects have significantly higher vBMD than GOLD 0 subjects (p<0.0001).

**Table E1:** Modified Global Initiative for Chronic Obstructive Lung Disease (GOLD) Classification as used in the COPDGene Study, defines severity of obstruction using post-bronchodilator spirometry and includes all chronic smokers.

| Stage             | Description                                                                                                                                                   | Spirometric Characteristics                                                          |
|-------------------|---------------------------------------------------------------------------------------------------------------------------------------------------------------|--------------------------------------------------------------------------------------|
| GOLD 0            | Chronic Smoker without spirometric obstruction based on population values – not related to symptoms (not part of the current 2011 GOLD classification system) | FEV <sub>1</sub> ≥ 80% predicted<br>FEV <sub>1</sub> /FVC > 0.7                      |
| GOLD 1            | Mild COPD                                                                                                                                                     | FEV <sub>1</sub> /FVC < 0.7<br>FEV <sub>1</sub> ≥ 80% predicted                      |
| GOLD 2            | Moderate COPD                                                                                                                                                 | FEV <sub>1</sub> /FVC < 0.7<br>FEV <sub>1</sub> < 80% predicted, but > 50% predicted |
| GOLD 3            | Severe COPD                                                                                                                                                   | FEV <sub>1</sub> /FVC < 0.7<br>FEV <sub>1</sub> < 50% but > 30% predicted            |
| GOLD 4            | Very Severe COPD                                                                                                                                              | FEV <sub>1</sub> /FVC < 0.7<br>FEV <sub>1</sub> < 30% predicted                      |
| GOLD Unclassified | Chronic smoker – Preserved Ratio with Impaired Spirometry                                                                                                     | FEV <sub>1</sub> /FVC > 0.7<br>FEV <sub>1</sub> or FVC < 80% predicted               |



**Table E2: Baseline Characteristics of QCT BMD Cohort Compared to Remaining COPDGene Subjects**

|                                                            | <b>Bone Density Cohort</b> | <b>Cohort without Bone Density Measures</b> | <b>P value</b> |
|------------------------------------------------------------|----------------------------|---------------------------------------------|----------------|
| N                                                          | 3321                       | 6979                                        |                |
| Age (SD)                                                   | 59.4 (9.0)                 | 59.7 (9.0)                                  | NS             |
| Gender, % male                                             | 52%                        | 54%                                         | NS             |
| Race, % African-American                                   | 31.3%                      | 34.1%                                       | p=0.005        |
| School completed (% with some college or more)             | 60.9%                      | 61.0%                                       | NS             |
| BMI (SD)                                                   | 28.8 (6.2)                 | 28.8 (6.3)                                  | NS             |
| Current Smoker, %                                          | 51.6%                      | 53.0%                                       | NS             |
| Pack-years (SD)                                            | 43.7 (24.4)                | 44.5 (25.2)                                 | NS             |
| Six minute walk distance (feet)                            | 1406 (388)                 | 1328 (402)                                  | p<0.0001       |
| Resting O2 Saturation                                      | 95.8 (3.3)                 | 96.3 (2.7)                                  | p<0.0001       |
| Chronic Oral Steroid Use, %                                | 2.3%                       | 2.6%                                        | NS             |
| Inhaled Steroid Use, %                                     | 23.4%                      | 23.3%                                       | NS             |
| Treated with steroids in past year for exacerbation, N (%) | 514 (16.4%)                | 1507 (17.0%)                                | NS             |
| GOLD Status, N (%)                                         |                            |                                             | p<0.0001       |
| Non Smokers                                                | 63 (1.9%)                  | 45 (0.7%)                                   |                |
| Smoker Controls                                            | 1442 (43.6%)               | 2946 (42.5%)                                |                |
| GOLD 1                                                     | 240 (7.3%)                 | 554 (8.0%)                                  |                |
| GOLD 2                                                     | 598 (18.1%)                | 1324 (19.1%)                                |                |
| GOLD 3                                                     | 377 (11.4%)                | 785 (11.3%)                                 |                |
| GOLD 4                                                     | 189 (5.7%)                 | 417 (6.0%)                                  |                |
| GOLD Unclassified                                          | 397 (12.0%)                | 860 (12.4%)                                 |                |
| Physician Diagnosed Osteoporosis, %                        | 8.7%                       | 8.9%                                        | NS             |
| Prior Diagnosis of Hip Fracture, %                         | 2.1%                       | 1.7%                                        | NS             |
| SF-36 PCS                                                  | 43.9 (11.1)                | 44.3 (11.0)                                 | NS             |
| SF-36 MCS                                                  | 49.0 (12.0)                | 49.2 (11.7)                                 | NS             |
| SGRQ total score                                           | 27.6 (23.4)                | 26.9 (22.7)                                 | NS             |

**Table E3: Thoracic BMD, Osteoporosis and Vertebral Fractures across GOLD by Race and Gender\***

| <i>Thoracic QCT BMD in Non-Hispanic White Subjects</i>                 |              |                 |              |              |              |             |              |
|------------------------------------------------------------------------|--------------|-----------------|--------------|--------------|--------------|-------------|--------------|
| n=2283                                                                 | Non-smokers  | Smoker Controls | GOLD U       | GOLD 1       | GOLD 2       | GOLD 3      | GOLD 4       |
| Male                                                                   | 133.6 (34.7) | 113.5 (33.9)    | 116.3 (38.0) | 107.5 (32.0) | 102.5 (37.6) | 94.3 (37.8) | 86.0 (31.5)  |
| Female                                                                 | 128.5 (44.4) | 129.5 (40)      | 126.3 (42.9) | 114.9 (40)   | 110.3 (38.5) | 109.1 (42)  | 96.7 (34.5)  |
| <b>Significance</b>                                                    | NS           | 0.0001          | 0.07         | NS           | 0.03         | 0.002       | 0.045        |
| <i>Thoracic QCT BMD in African American Subjects *</i>                 |              |                 |              |              |              |             |              |
| n=1038                                                                 |              | Smoker Controls | GOLD U       | GOLD 1       | GOLD 2       | GOLD 3      | GOLD 4       |
| Male                                                                   |              | 151.9 (40)      | 154.8 (39)   | 158.9 (43)   | 142.4 (44.3) | 143.4 (39)  | 121.5 (37)   |
| Female                                                                 |              | 159.5 (48)      | 190.0 (49)   | 162.4 (54)   | 158.0 (50)   | 147.0 (41)  | 136.0 (52.5) |
| <b>Significance</b>                                                    |              | 0.049           | <0.0001      | NS           | 0.04         | NS          | NS           |
| <i>Low Bone Density<sup>†</sup> in Non-Hispanic White Subjects</i>     |              |                 |              |              |              |             |              |
| n=2283                                                                 | Non-smokers  | Smoker Controls | GOLD U       | GOLD 1       | GOLD 2       | GOLD 3      | GOLD 4       |
| Male                                                                   | 47.4%        | 71.5%           | 66.0%        | 75.5%        | 77.9%        | 87.4%       | 91.1%        |
| Female                                                                 | 61.5%        | 56.8%           | 57.5%        | 65.1%        | 73.5%        | 72.2%       | 85.0%        |
| <b>Significance</b>                                                    | 0.04         | <0.0001         | NS           | 0.02         | 0.04         | 0.005       | NS           |
| <i>Low Bone Density<sup>†</sup> in African American Subjects*</i>      |              |                 |              |              |              |             |              |
| n=1038                                                                 |              | Smoker Controls | GOLD U       | GOLD 1       | GOLD 2       | GOLD 3      | GOLD 4       |
| Male                                                                   |              | 33.0%           | 23.8%        | 20.7%        | 35.8%        | 39.6%       | 64.7%        |
| Female                                                                 |              | 30.3%           | 9.3%         | 26.1%        | 34.7%        | 41.0%       | 53%          |
| <b>Significance</b>                                                    |              | NS              | 0.0001       | NS           | NS           | NS          | NS           |
| <i>Vertebral fractures<sup>‡</sup> in Non-Hispanic White Subjects*</i> |              |                 |              |              |              |             |              |
| n=664                                                                  |              | Smoker Controls | GOLD U       | GOLD 1       | GOLD 2       | GOLD 3      | GOLD 4       |
| Male                                                                   |              | 39.5 %          | 39.8 %       | 40.6 %       | 47.6 %       | 51.7 %      | 39.6 %       |
| Female                                                                 |              | 25 %            | 23.2 %       | 29.1 %       | 33.8 %       | 40.9 %      | 35.3 %       |
| <b>Significance</b>                                                    |              | p<0.0001        | 0.007        | NS           | 0.003        | NS          | NS           |

| <b>Vertebral fractures<sup>‡</sup> in African American Subjects*</b> |  |                 |        |        |        |        |        |
|----------------------------------------------------------------------|--|-----------------|--------|--------|--------|--------|--------|
| n=228                                                                |  | Smoker Controls | GOLD U | GOLD 1 | GOLD 2 | GOLD 3 | GOLD 4 |
| Male                                                                 |  | 24.7 %          | 21.4 % | 26.7 % | 23.5 % | 20.8 % | 41.2%  |
| Female                                                               |  | 18.6 %          | 15.1 % | 26.3 % | 22.2 % | 23.1 % | 20%    |
| <b>Significance</b>                                                  |  | NS              | NS     | NS     | NS     | NS     | NS     |

\* The non-smoker group did not include sufficient African American nor fractures for analysis

† Percentage of subjects with T-score<sub>QCT</sub> ≤ -2.5

‡ Percentage of subjects with one or more fracture
